# Supplementary material for: Predictors of silicosis and variation in prevalence across mines among employed gold miners in South Africa
Source: PubMed Central journal article supplement (PMC7268682; doi:10.1186/s12889-020-08876-2), 2020-06-01
Supplement: 12889_2020_8876_MOESM1_ESM.pdf [file 12889_2020_8876_MOESM1_ESM.pdf]

# Predictors of silicosis and variation in prevalence across mines among employed gold miners in South Africa.

Knight D, Ehrlich R, Cois A, Fielding K, Grant AD, Churchyard G

## Additional File 1

Figure S1: Relationship between years in the industry and risk of silicosis: generalised additive model\*.

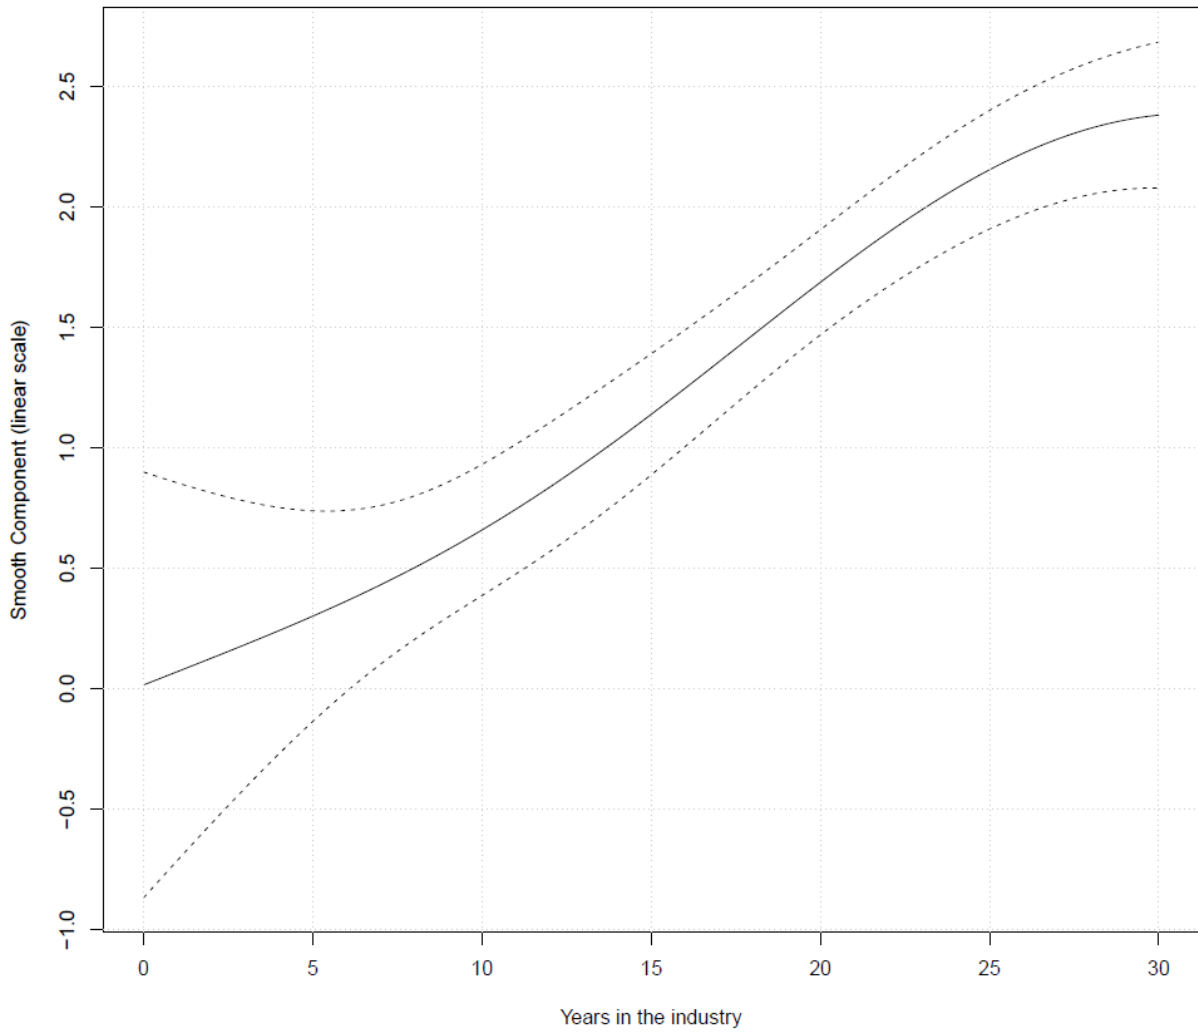

\* Thin plate spline with K=5. Output centred so that risk=0 for 0 years in the industry.

Figure S2: Relationship between years in the industry and risk of silicosis:  
Fractional polynomial model\*.

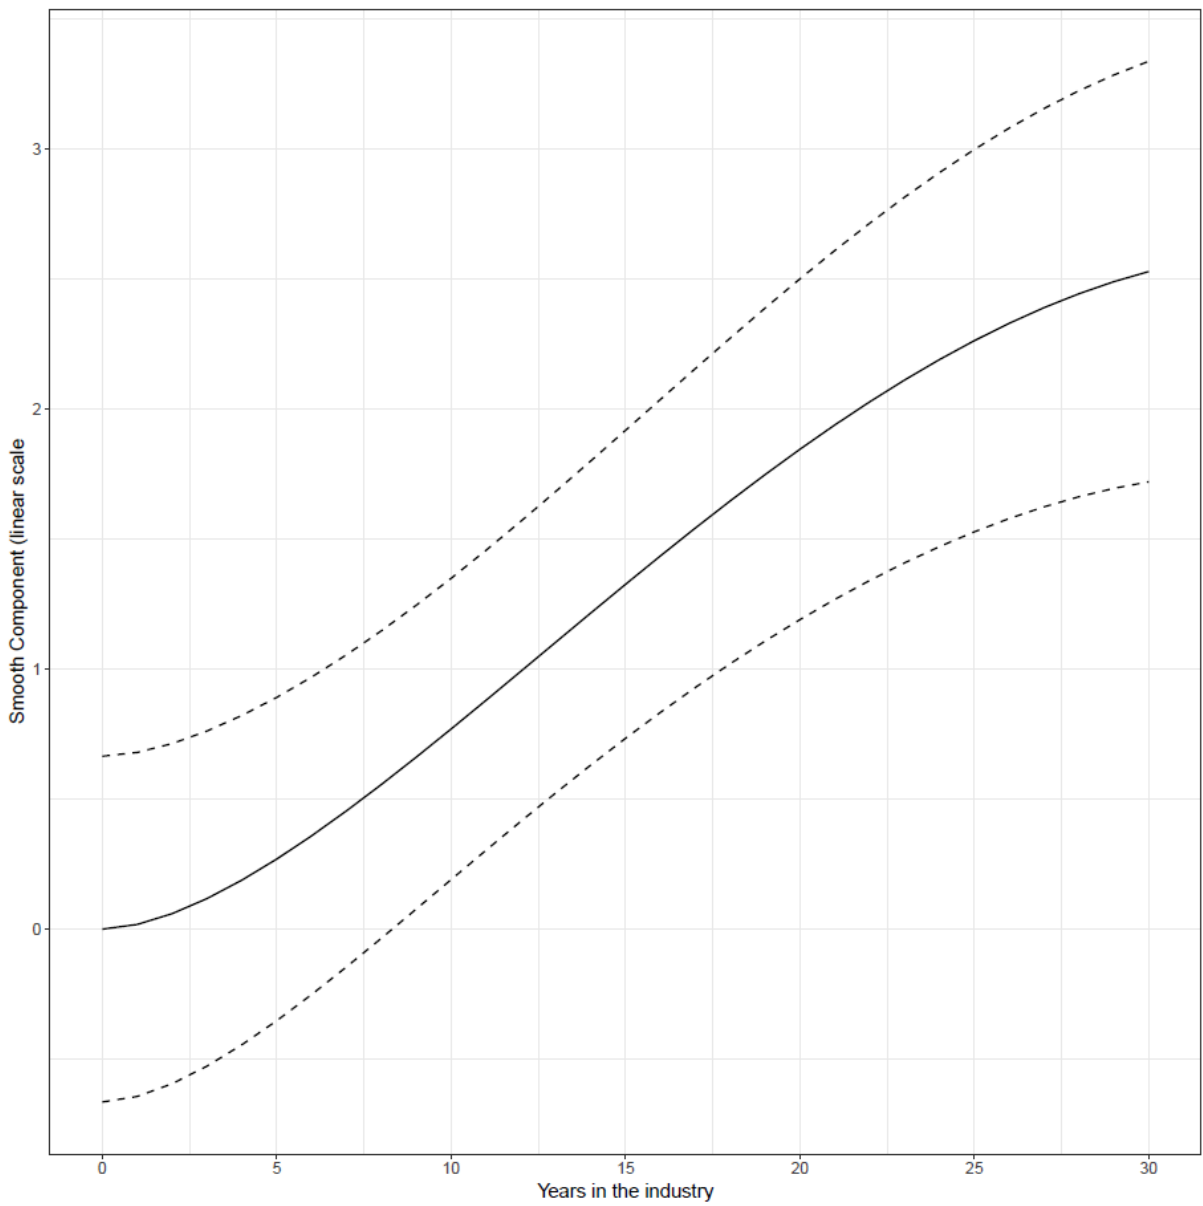

\* Stata default values for powers to be searched (-2, -1, -0.5, 0.5, 1, 2, 3) and maximum degree of the polynomial (2). Plotted output centred so that risk=0 for 0 years in the industry.

Table S1: Logistic model for prediction of silicosis including interaction between age category and years since first exposure. Estimated coefficients.

| silibin11           | Odds Ratio | Std. Err. | z     | P> z  | [95% Conf. Interval] |  |
|---------------------|------------|-----------|-------|-------|----------------------|--|
| cluster             |            |           |       |       |                      |  |
| Beatrix 1 2 3       | 1.704018   | .4549232  | 2.00  | 0.046 | 1.009783 2.875545    |  |
| Beatrix 4           | 1.455404   | .5346897  | 1.02  | 0.307 | .7083814 2.990198    |  |
| Cooke 3             | 2.210243   | .5045339  | 3.47  | 0.001 | 1.412978 3.457359    |  |
| Elandsrand          | 1.751467   | .4358742  | 2.25  | 0.024 | 1.0754 2.852555      |  |
| GN MK               | 4.334266   | .9234137  | 6.88  | 0.000 | 2.854746 6.580573    |  |
| Kloof 1 3 4         | 1.370326   | .3621594  | 1.19  | 0.233 | .8163234 2.300305    |  |
| Kloof 7             | .6495908   | .2140216  | -1.31 | 0.190 | .3405598 1.239043    |  |
| Kloof 8             | 1.758951   | .4797976  | 2.07  | 0.038 | 1.030546 3.002203    |  |
| Kopanang            | 3.478614   | .7340283  | 5.91  | 0.000 | 2.300343 5.260412    |  |
| Masimong 5          | 1.793757   | .3875451  | 2.70  | 0.007 | 1.174518 2.739476    |  |
| Mponeng             | 1.962093   | .4927286  | 2.68  | 0.007 | 1.199396 3.209791    |  |
| Tau Lekoa           | .4150288   | .1559488  | -2.34 | 0.019 | .1987174 .8668036    |  |
| Tau Tona            | 1.697019   | .4169042  | 2.15  | 0.031 | 1.048511 2.74663     |  |
| Tshepong            | 1.576502   | .358099   | 2.00  | 0.045 | 1.010058 2.460612    |  |
| sex                 |            |           |       |       |                      |  |
| female              | 1.129782   | .8606711  | 0.16  | 0.873 | .2538322 5.028546    |  |
| agecat              |            |           |       |       |                      |  |
| 35-39               | 4.699053   | 4.332858  | 1.68  | 0.093 | .7711564 28.63374    |  |
| 40-44               | 3.629001   | 4.467364  | 1.05  | 0.295 | .3250446 40.51643    |  |
| 45-49               | 5.41092    | 6.448902  | 1.42  | 0.157 | .5233384 55.94478    |  |
| 50+                 | 5.844591   | 6.867847  | 1.50  | 0.133 | .5841527 58.47657    |  |
| yindustryat5        |            |           |       |       |                      |  |
| 5-9                 | 2.277851   | 1.871359  | 1.00  | 0.316 | .4552232 11.39794    |  |
| 10-14               | 3.889701   | 3.205762  | 1.65  | 0.099 | .7733642 19.56358    |  |
| 15-19               | 12.51139   | 17.1688   | 1.84  | 0.066 | .8496525 184.234     |  |
| 20-24               | 12.1145    | 16.21811  | 1.86  | 0.062 | .8785617 167.0471    |  |
| 25-29               | 8.696588   | 11.55712  | 1.63  | 0.104 | .6429326 117.6339    |  |
| 30+                 | 13.85319   | 18.25892  | 1.99  | 0.046 | 1.046261 183.4253    |  |
| agecat#yindustryat5 |            |           |       |       |                      |  |
| 35-39#5-9           | .4963554   | .6447504  | -0.54 | 0.590 | .0389142 6.331072    |  |
| 35-39#10-14         | .1913051   | .2294855  | -1.38 | 0.168 | .018224 2.008212     |  |
| 35-39#15-19         | .128067    | .2030509  | -1.30 | 0.195 | .005726 2.864324     |  |
| 35-39#20-24         | .1084553   | .1970858  | -1.22 | 0.222 | .0030792 3.819972    |  |
| 40-44#5-9           | 2.272314   | 3.49727   | 0.53  | 0.594 | .1112762 46.40176    |  |
| 40-44#10-14         | .150768    | .2228048  | -1.28 | 0.200 | .0083254 2.730324    |  |
| 40-44#15-19         | .224298    | .1362143  | -2.46 | 0.014 | .0682178 .7374848    |  |
| 40-44#20-24         | .4929016   | .232623   | -1.50 | 0.134 | .1954515 1.24303     |  |
| 45-49#10-14         | 1.262533   | 1.511633  | 0.19  | 0.846 | .1208084 13.19435    |  |
| 45-49#15-19         | .4359575   | .2404643  | -1.51 | 0.132 | .1478906 1.285132    |  |
| 45-49#20-24         | .397186    | .1490739  | -2.46 | 0.014 | .1903341 .8288411    |  |
| 45-49#25-29         | 1.090098   | .321835   | 0.29  | 0.770 | .6111689 1.94433     |  |
| black               |            |           |       |       |                      |  |
| Other               | .3506415   | .1685609  | -2.18 | 0.029 | .1366697 .89961      |  |
| corigindef          |            |           |       |       |                      |  |
| Lesotho             | 1.189335   | .1243603  | 1.66  | 0.097 | .9689475 1.459851    |  |
| Swaziland           | .8579425   | .2050602  | -0.64 | 0.521 | .5370432 1.370589    |  |
| Mozambique          | .5292937   | .0941498  | -3.58 | 0.000 | .3734966 .7500787    |  |
| Botswana            | 1.101456   | .3099554  | 0.34  | 0.731 | .6345043 1.912052    |  |
| occlevl             |            |           |       |       |                      |  |
| Skilled             | .7971475   | .1700487  | -1.06 | 0.288 | .5247581 1.210928    |  |
| undergroundFT       |            |           |       |       |                      |  |
| None/Part time      | .4630834   | .1106439  | -3.22 | 0.001 | .289923 .7396661     |  |

Notes

- 1.agecat#4.yindustryat5, 1.agecat#5.yindustryat5, 1.agecat#6.yindustryat5, 2.agecat#5.yindustryat5 and 2.agecat#6.yindustryat5 identify no observations in the sample;

- 3.agecat#5.yindustrycat5, 4.agecat#6.yindustrycat5, 5.agecat#2.yindustrycat5, 5.agecat#3.yindustrycat5, 5.agecat#4.yindustrycat5, 5.agecat#5.yindustrycat5 and 5.agecat#6.yindustrycat5 omitted because of collinearity;
- 8.corigindef != 0, 1.agecat#3.yindustrycat5 != 0, 1.agecat#3.yindustrycat5 != 0, 3.agecat#0.yindustrycat5 != 0, 3.agecat#6.yindustrycat5 != 0, 4.agecat#0.yindustrycat5 != 0, 4.agecat#1.yindustrycat5 != 0, 5.agecat#0.yindustrycat5 != 0, 5.agecat#1.yindustrycat5 predict failure perfectly and are dropped from the model.

### **Likelihood ratio test**

for significant differences in model fit between this model and the base model without interaction between age category and years since first exposure

Base model: log-likelihood = -1927.9448

Interaction model: log-likelihood = -1915.942

LR test statistics:  $-2*(-1927.94+1915.94) = 24.00$ ,  $df = 24$ ,  $p\text{-value} = 0.45$
